# Supplementary material
Source: publisher site journal article supplement (https://kjim.org/upload/media/kjim-2024-041-Supplementary-Table-1.pdf)
Supplement: Supplementary file 1 [file kjim-2024-041-Supplementary-Table-1.pdf]

**Supplementary Table 1. Univariate analysis of prognostic factors for OS**

| Characteristic                      | Total      | Median OS (mo) | <i>p</i> value |
|-------------------------------------|------------|----------------|----------------|
| Age (yr)                            |            |                | 0.017          |
| 80–83                               | 80 (63.5)  | 10.1           |                |
| ≥ 84                                | 46 (36.5)  | 7.9            |                |
| Sex                                 |            |                | 0.971          |
| Male                                | 63 (50.0)  | 9.6            |                |
| Female                              | 63 (50.0)  | 8.8            |                |
| ECOG PS                             |            |                | < 0.001        |
| ≤ 2                                 | 75 (59.5)  | 18.9           |                |
| > 2                                 | 51 (40.5)  | 3.5            |                |
| CCI                                 |            |                | 0.373          |
| ≤ 4                                 | 34 (27.0)  | 7.9            |                |
| > 4                                 | 92 (73.0)  | 9.3            |                |
| ISS                                 |            |                | 0.005          |
| I, II                               | 37 (30.8)  | 24             |                |
| III                                 | 83 (69.2)  | 7.9            |                |
| R-ISS                               |            |                | 0.641          |
| I, II                               | 50 (52.1)  | 14.2           |                |
| III                                 | 46 (47.9)  | 8.9            |                |
| CRAB criteria                       |            |                |                |
| Hemoglobin < 10 g/dL                |            |                | 0.918          |
| Presence                            | 94 (74.6)  | 8.2            |                |
| Absence                             | 32 (25.4)  | 11.4           |                |
| Bone disease                        |            |                | 0.714          |
| Presence                            | 84 (77.8)  | 7.9            |                |
| Absence                             | 24 (22.2)  | 12.2           |                |
| Calcium > 11 mg/dL                  |            |                | 0.007          |
| Presence                            | 11 (8.7)   | 1.6            |                |
| Absence                             | 115 (91.3) | 11.4           |                |
| Creatinine > 2 mg/dL                |            |                | 0.692          |
| Presence                            | 32 (25.6)  | 2.6            |                |
| Absence                             | 93 (74.4)  | 10.1           |                |
| Lab                                 |            |                |                |
| Platelet < 100 × 10 <sup>9</sup> /L |            |                | 0.007          |
| Presence                            | 32 (25.6)  | 3.5            |                |
| Absence                             | 93 (74.4)  | 14.9           |                |
| Albumin < 3.5 g/dL                  |            |                | 0.990          |
| Presence                            | 85 (67.5)  | 7.9            |                |
| Absence                             | 41 (32.5)  | 13.3           |                |
| LDH elevation                       |            |                | 0.423          |
| Presence                            | 48 (39.0)  | 7.7            |                |
| Absence                             | 75 (61.0)  | 14.2           |                |

**Supplementary Table 1. Continued**

| Characteristic                      | Total     | Median OS (mo) | <i>p</i> value |
|-------------------------------------|-----------|----------------|----------------|
| High-risk cytogenetic abnormalities |           |                | 0.985          |
| Presence                            | 21 (22.3) | 11.2           |                |
| Absence                             | 73 (77.7) | 14.9           |                |
| Treatment                           |           |                | < 0.001        |
| Chemotherapy                        | 85 (67.5) | 16.4           |                |
| Best supportive care                | 41 (32.5) | 1.9            |                |
| Year of diagnosis                   |           |                | 0.527          |
| 2010                                | 11 (8.7)  | 12.2           |                |
| 2011                                | 5 (3.9)   | 1.6            |                |
| 2012                                | 8 (6.3)   | 4.5            |                |
| 2013                                | 8 (6.3)   | 11.3           |                |
| 2014                                | 13 (10.2) | 9.6            |                |
| 2015                                | 17 (13.4) | 18.9           |                |
| 2016                                | 17 (13.4) | 4              |                |
| 2017                                | 13 (10.2) | 14.2           |                |
| 2018                                | 8 (6.3)   | 5.5            |                |
| 2019                                | 27 (21.3) | 3.8            |                |

Values are presented as number (%).

OS, overall survival; ECOG PS, Eastern Cooperative Oncology Group Performance Status; CCI, Charlson comorbidity index; ISS, International Staging System; R-ISS, Revised International Staging System; CRAB, hypercalcemia, renal failure, anemia, and bone disease; LDH, lactate dehydrogenase.
